# Supplementary material
Source: Research Square preprint supplement (doi:10.21203/rs.3.rs-9549473/v1)
Supplement: Supplementary file 1 [file 3ba133205a883d7c7e479a70.docx]

## Appendix 1. Unfiltered process map at 100% activity and path threshold, displaying all observed transitions between care events (spaghetti map)


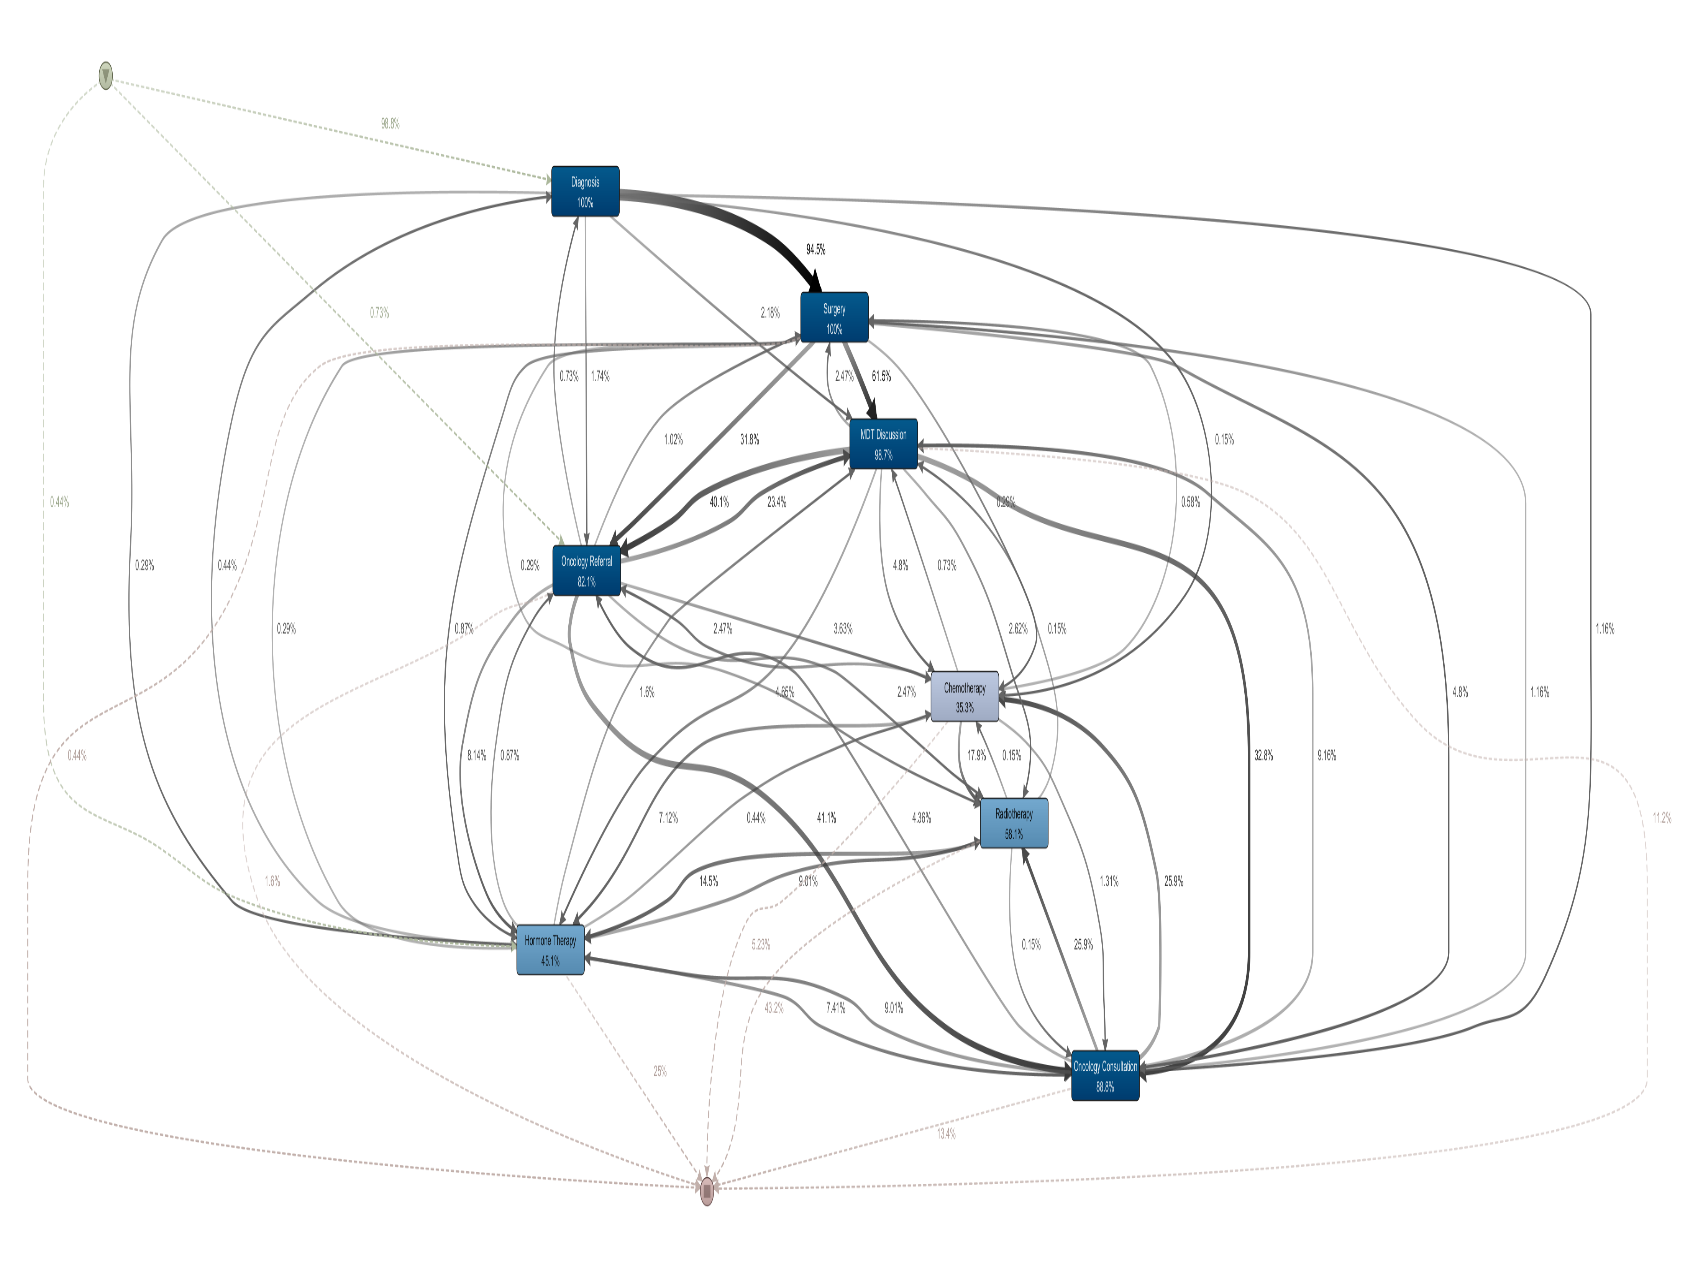


## Appendix 2. Distribution of coordination patterns by hospital

| **Coordination pattern** | **Wollongong Hospital (n=535)** | **Shoalhaven Hospital (n=153)** | **Total (n=688)** |
| --- | --- | --- | --- |
| MDT before referral | 185 (34.6%) | 75 (49.0%) | 260 (37.8%) |
| Referral-led | 197 (36.8%) | 27 (17.6%) | 224 (32.6%) |
| MDT-only | 83 (15.5%) | 39 (25.5%) | 122 (17.7%) |
| Same-day MDT and referral | 63 (11.8%) | 10 (6.5%) | 73 (10.6%) |
| Referral-only | 6 (1.1%) | 2 (1.3%) | 8 (1.2%) |
| No recorded coordination | 1 (0.2%) | 0 (0.0%) | 1 (0.1%) |
| **Total** | **535 (100.0%)** | **153 (100.0%)** | **688 (100.0%)** |

*χ² = 30.1, df = 5, p < 0.001*

*Note: Percentages are column percentages within hospital. Cases with same-day MDT discussion and oncology referral are displayed separately to indicate the extent of timestamp-ordering ambiguity, but were classified as MDT-led in the primary regression model.****Appendix 3. Sensitivity analyses for coordination pattern classification***

| **Sensitivity model** | **N** | **Shoalhaven OR** | **95% CI** | **p** |
| --- | --- | --- | --- | --- |
| Primary Model B (same-day → MDT-led) | 547 | 2.54 | 1.56–4.05 | <0.001 |
| Sensitivity 1: same-day → Referral-led | 547 | 2.91 | 1.86–4.55 | <0.001 |
| Sensitivity 2: same-day excluded entirely | 474 | 3.00 | 1.83–4.94 | <0.001 |
| Sensitivity 3: MDT-dominated (incl. MDT-only) vs Referral-dominated | 668 | 2.63 | 1.68–4.14 | <0.001 |
| Sensitivity 4: hormone therapy events removed from event log* | 547 | 2.54 | 1.56–4.05 | <0.001 |

*Note: All models were adjusted for molecular subtype, TNM stage, histological grade, age group, and treating hospital, with Wollongong Hospital as the reference category. Models used complete-case data, so patients with missing or non-applicable histological grade or unknown molecular subtype were excluded. The primary Model B sample was n=547, compared with n=557 in the descriptive MDT-led/Referral-led cohort. Removal of hormone therapy events assessed whether incomplete hormone therapy dates affected reconstructed pathway classification and did not materially change the MDT-led vs Referral-led model.*

## Appendix 4. Outcome distribution by covariate for Models A and B

**Appendix 4A. Covariate distribution by pre-treatment oncology consultation**

| **Covariate stratum** | **N** | **Pre-treatment oncology consultation: YES** | **Pre-treatment oncology consultation: NO** |
| --- | --- | --- | --- |
| *Molecular subtype* | | | |
| Luminal | 407 | 322 (79.1%) | 85 (20.9%) |
| HER2-positive | 69 | 60 (87.0%) | 9 (13.0%) |
| Triple negative | 53 | 50 (94.3%) | 3 (5.7%) |
| *TNM stage* | | | |
| I | 225 | 186 (82.7%) | 39 (17.3%) |
| II | 234 | 189 (80.8%) | 45 (19.2%) |
| III–IV | 78 | 63 (80.8%) | 15 (19.2%) |
| *Histological grade* | | | |
| 1 | 87 | 65 (74.7%) | 22 (25.3%) |
| 2 | 244 | 188 (77.0%) | 56 (23.0%) |
| 3 | 200 | 179 (89.5%) | 21 (10.5%) |
| *Age group* | | | |
| <65 | 288 | 241 (83.7%) | 47 (16.3%) |
| ≥65 | 249 | 197 (79.1%) | 52 (20.9%) |
| *Hospital* | | | |
| Wollongong | 421 | 337 (80.0%) | 84 (20.0%) |
| Shoalhaven | 116 | 101 (87.1%) | 15 (12.9%) |

*Note: This table describes the descriptive sample for Model A, defined as patients with a recorded first treatment initiation date and sufficient information to determine whether oncology consultation occurred before or on that date (N=537). The complete-case regression sample used in Figure 3 Model A was n=529 after excluding patients with incomplete covariate information. Patients with unknown molecular subtype (n=8) and missing or non-applicable histological grade (n=6) were included in the overall cohort total but omitted from the corresponding stratified rows because of small cell counts. Percentages are calculated within each covariate stratum.*

**Appendix 4B. Covariate distribution by coordination pattern**

| **Covariate stratum** | **N** | **MDT-led** | **Referral-led** |
| --- | --- | --- | --- |
| *Molecular subtype* | | | |
| Luminal | 441 | 263 (59.6%) | 178 (40.4%) |
| HER2-positive | 53 | 34 (64.2%) | 19 (35.8%) |
| Triple negative | 56 | 31 (55.4%) | 25 (44.6%) |
| *TNM stage* | | | |
| I | 246 | 138 (56.1%) | 108 (43.9%) |
| II | 232 | 147 (63.4%) | 85 (36.6%) |
| III–IV | 79 | 48 (60.8%) | 31 (39.2%) |
| *Histological grade* | | | |
| 1 | 105 | 62 (59.0%) | 43 (41.0%) |
| 2 | 256 | 151 (59.0%) | 105 (41.0%) |
| 3 | 190 | 115 (60.5%) | 75 (39.5%) |
| *Age group* | | | |
| <65 | 283 | 173 (61.1%) | 110 (38.9%) |
| ≥65 | 274 | 160 (58.4%) | 114 (41.6%) |
| *Hospital* | | | |
| Wollongong | 445 | 248 (55.7%) | 197 (44.3%) |
| Shoalhaven | 112 | 85 (75.9%) | 27 (24.1%) |

*Note: This table describes the MDT-led and Referral-led cohort (N=557). The complete-case sample used in the multivariable Model B was n=547. Patients with unknown molecular subtype (n=7) and missing or non-applicable histological grade (n=6) were included in the overall cohort total but omitted from the corresponding stratified rows because of small cell counts. Percentages are calculated within each covariate stratum.*
